# Supplementary figures and images for: The potential of CircRNA1002 as a biomarker in hepatitis B virus-related hepatocellular carcinoma
Source: PeerJ journal article supplement (doi:10.7717/peerj.13640), 2022-06-28

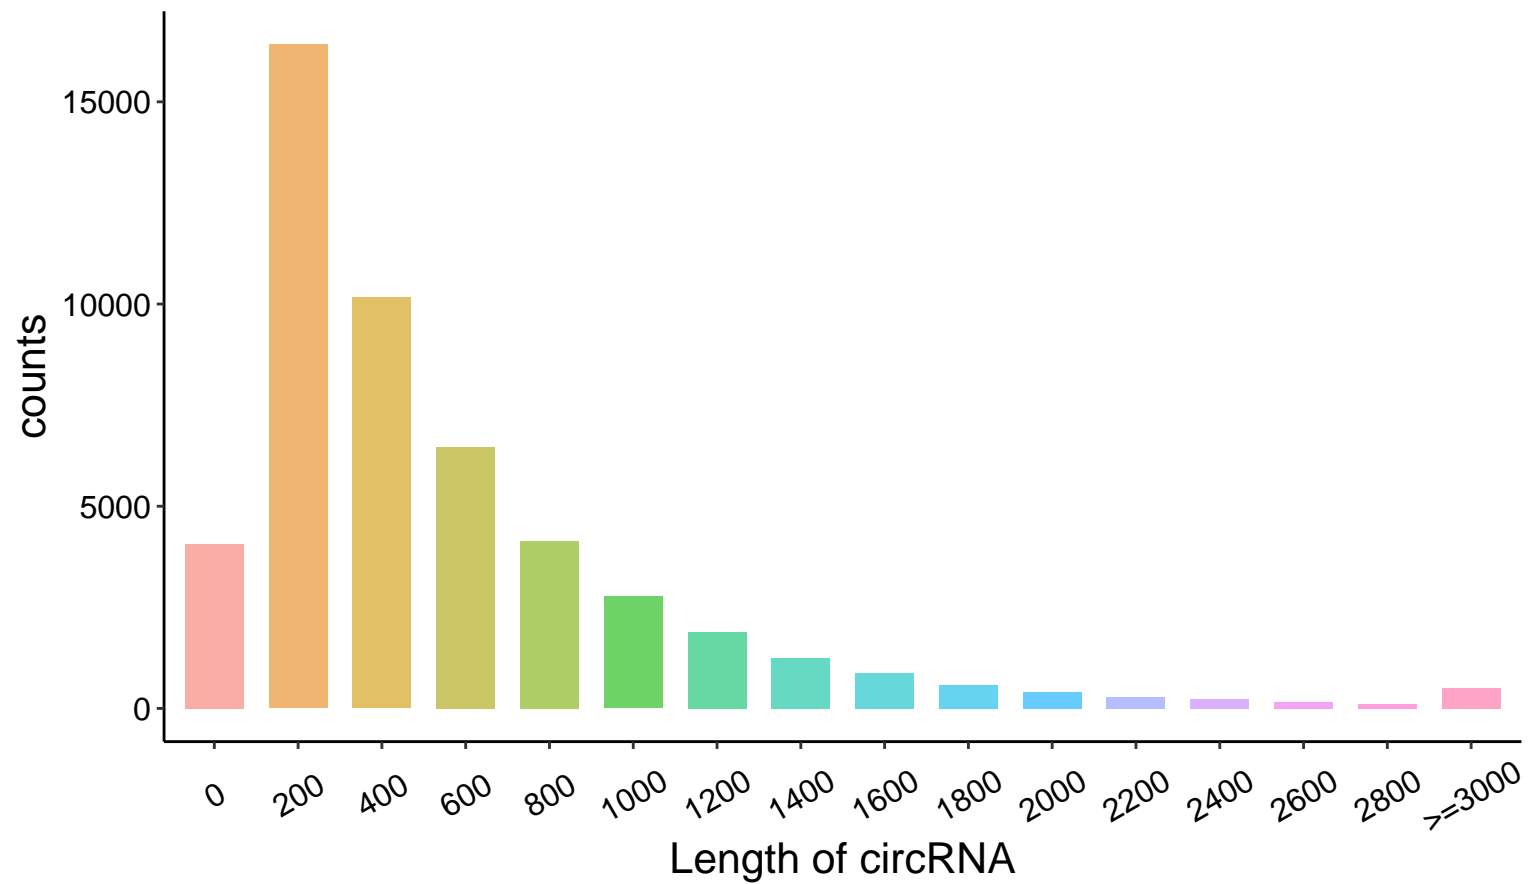

Supplement: raw_data.zip [file raw_data.zip]
